# Supplementary material
Source: Royal Society of Chemistry journal article supplement (doi:10.1039/d6cp00124f)
Supplement: d6cp00124f5.pdf [file d6cp00124f5.pdf]

**Supplementary Information for**  
**Biaxial Strain-Mediated Magnetic Phase Transition and Anisotropy Engineering**  
**in MoSBr Monolayer: A First-Principles Approach for Room-Temperature**  
**Spintronics**

*Yifan Zhao<sup>b</sup>, Xinyi Wang<sup>a</sup>, Peng Li<sup>a</sup>, and Ruilin Han<sup>\*a</sup>*

*<sup>a</sup> School of Physics and Electronic Engineering, Shanxi University, Taiyuan 030006, China*

*<sup>b</sup> Institute of Theoretical Physics, Shanxi University, Taiyuan, 030006, China*

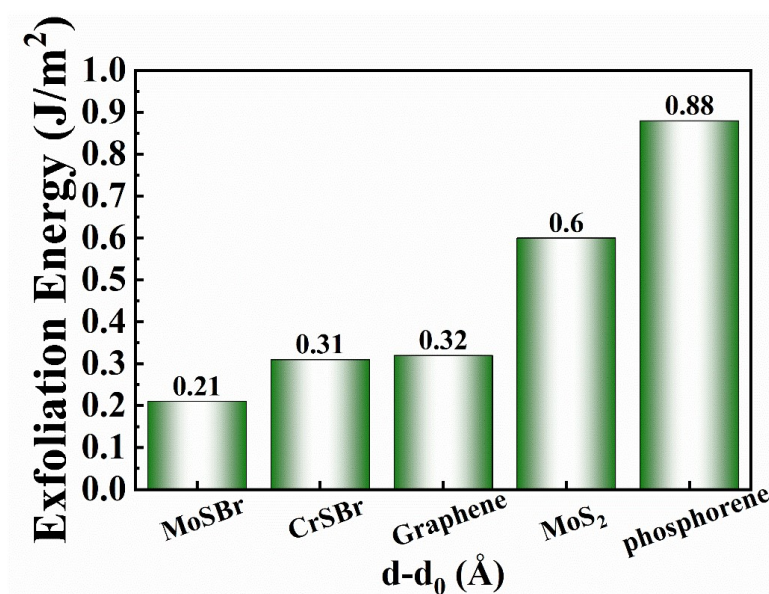

Fig. S1. Cleavage energies for the mechanically exfoliated MoSBr monolayers and in comparison with several other materials<sup>[66-69]</sup>.

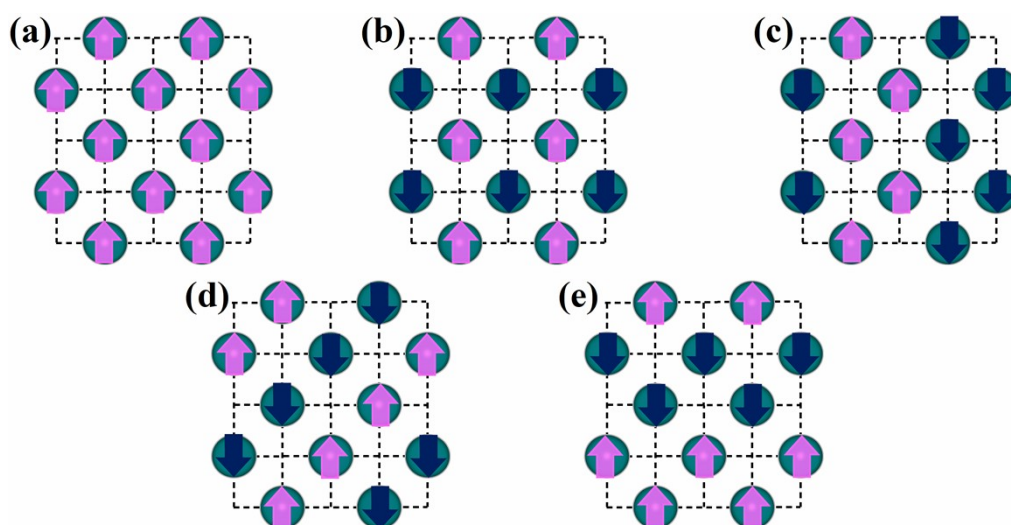

Fig. S2. The five possible magnetic configurations of the MoSBr monolayer: FM,

AFM1, AFM2, AFM3, and AFM4. The purple (blue) arrows represent spin-up (spin-down).

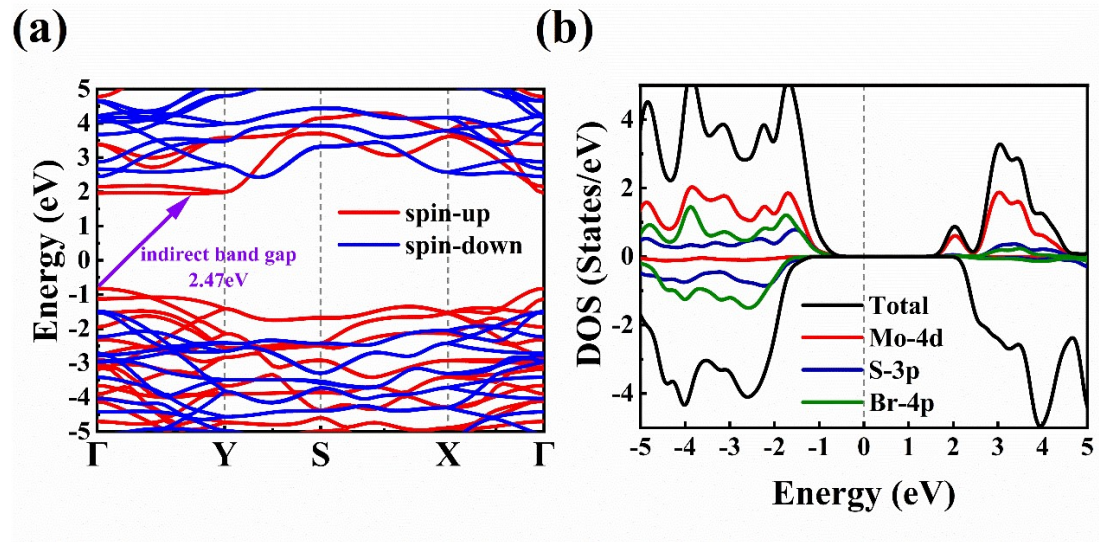

Fig. S3. (a) Band structures and (b) *DOS* of the MoSBr monolayer based on the HSE06 functional.

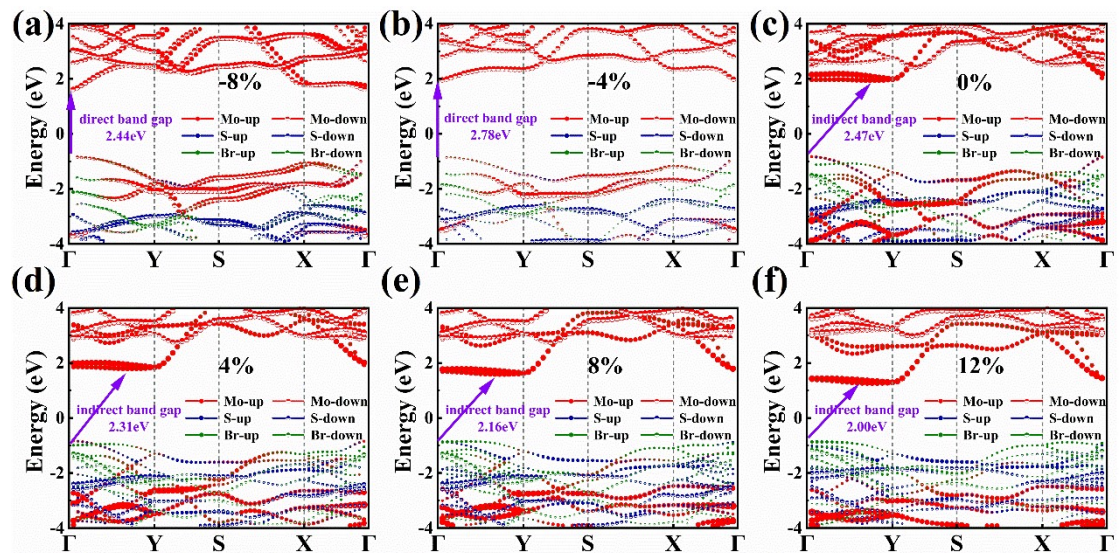

Fig. S4. (a)–(f) Energy band structures of the MoSBr monolayer under different biaxial strain values showing the transition from a direct-bandgap to an indirect-bandgap semiconductor.

Table. S1. Energies of the five possible magnetic structures of the MoSBr monolayer under different biaxial strains and corresponding energy differences between the FM and AFM states.

|            | <b>Energy (atom)</b> | <b>FM</b> | <b>AFM1</b> | <b>AFM2</b> | <b>AFM3</b> | <b>AFM4</b> |
|------------|----------------------|-----------|-------------|-------------|-------------|-------------|
| <b>-8%</b> | E (eV)               | -123.805  | -123.549    | -124.540    | -124.499    | -123.604    |
|            | $\Delta E$ (meV)     | 0         | 0.256       | 0.736       | 0.694       | 0.201       |
| <b>-6%</b> | E (eV)               | -126.073  | -125.801    | -126.508    | -126.407    | -125.807    |
|            | $\Delta E$ (meV)     | 0         | 0.272       | 0.435       | 0.334       | 0.265       |
| <b>-4%</b> | E (eV)               | -127.535  | -127.258    | -127.741    | -127.604    | -127.234    |
|            | $\Delta E$ (meV)     | 0         | 0.277       | 0.206       | 0.068       | 0.301       |
| <b>-2%</b> | E (eV)               | -128.311  | -128.033    | -128.346    | -128.188    | -127.993    |
|            | $\Delta E$ (meV)     | 0         | 0.278       | 0.035       | 0.123       | 0.318       |
| <b>0%</b>  | E (eV)               | -128.505  | -128.226    | -128.413    | -128.245    | -128.180    |
|            | $\Delta E$ (meV)     | 0         | 0.278       | 0.092       | 0.259       | 0.324       |
| <b>2%</b>  | E (eV)               | -128.197  | -127.924    | -128.019    | -127.851    | -127.879    |
|            | $\Delta E$ (meV)     | 0         | 0.274       | 0.179       | 0.347       | 0.318       |
| <b>4%</b>  | E (eV)               | -127.472  | -127.202    | -127.232    | -127.069    | -127.164    |
|            | $\Delta E$ (meV)     | 0         | 0.270       | 0.240       | 0.404       | 0.309       |
| <b>6%</b>  | E (eV)               | -126.393  | -126.126    | -126.111    | -125.957    | -126.097    |
|            | $\Delta E$ (meV)     | 0         | 0.267       | 0.282       | 0.436       | 0.296       |
| <b>8%</b>  | E (eV)               | -125.016  | -124.753    | -124.708    | -124.565    | -124.736    |
|            | $\Delta E$ (meV)     | 0         | 0.263       | 0.308       | 0.451       | 0.281       |
| <b>10%</b> | E (eV)               | -123.393  | -123.133    | -123.069    | -122.939    | -123.128    |
|            | $\Delta E$ (meV)     | 0         | 0.260       | 0.324       | 0.454       | 0.265       |
| <b>12%</b> | E (eV)               | -121.565  | -121.308    | -121.233    | -121.116    | -121.318    |
|            | $\Delta E$ (meV)     | 0         | 0.257       | 0.332       | 0.449       | 0.247       |

Table. S2. SOC-MAE, shape-MAE, total MAE (in meV), and atomic MAE for the MoSBr monolayer with the (001) direction taken as reference.

|                         | $E_{(100)}$ (meV) | $E_{(010)}$ (meV) | $E_{(001)}$ (meV) | EMA            |
|-------------------------|-------------------|-------------------|-------------------|----------------|
| <b>SOC-MAE</b>          | 0.269             | -0.464            | 0                 |                |
| <b>Shape-MAE</b>        | -0.065            | -0.056            | 0                 | In-plane (010) |
| <b>Total-MAE</b>        | 0.205             | -0.520            | 0                 |                |
| <b>MAE<sub>Mo</sub></b> | 0.126             | -0.076            | 0                 |                |
| <b>MAE<sub>S</sub></b>  | -0.007            | 0.014             | 0                 | In-plane (010) |
| <b>MAE<sub>Br</sub></b> | 0.002             | -0.163            | 0                 |                |

Table. S3. Orbital-resolved contributions to MAE from Mo  $d$ -orbitals and Br  $p$ -orbitals, with the magnetization aligned along (100) crystallographic directions.

|               | $d_{xy}$ | $d_{yz}$ | $d_{z^2}$ | $d_{xz}$ | $d_{x^2-y^2}$ |
|---------------|----------|----------|-----------|----------|---------------|
| $d_{xy}$      | 0.000    | 0.000    | 0.000     | 0.005    | -0.530        |
| $d_{yz}$      | 0.000    | 0.000    | 0.800     | -0.005   | -0.205        |
| $d_{z^2}$     | 0.000    | 0.800    | 0.000     | 0.000    | 0.000         |
| $d_{xz}$      | 0.005    | -0.005   | 0.000     | 0.000    | 0.000         |
| $d_{x^2-y^2}$ | -0.530   | -0.205   | 0.000     | 0.000    | 0.000         |

|       | $p_y$  | $p_z$  | $p_x$  |
|-------|--------|--------|--------|
| $p_y$ | 0.000  | 0.107  | -0.111 |
| $p_z$ | 0.107  | 0.000  | -0.001 |
| $p_x$ | -0.111 | -0.001 | 0.000  |

Table. S4. Orbital-resolved contributions to MAE from Mo  $d$ -orbitals with the

magnetization aligned along (010) crystallographic directions.

|               | $d_{xy}$ | $d_{yz}$ | $d_{z^2}$ | $d_{xz}$ | $d_{x^2-y^2}$ |
|---------------|----------|----------|-----------|----------|---------------|
| $d_{xy}$      | 0.000    | 0.000    | 0.000     | -0.011   | -0.517        |
| $d_{yz}$      | 0.000    | 0.000    | 0.008     | -0.015   | 0.005         |
| $d_{z^2}$     | 0.000    | 0.008    | 0.000     | 0.000    | 0.000         |
| $d_{xz}$      | -0.011   | -0.015   | 0.000     | 0.000    | 0.000         |
| $d_{x^2-y^2}$ | -0.517   | 0.005    | 0.000     | 0.000    | 0.000         |

|       | $p_y$  | $p_z$ | $p_x$  |
|-------|--------|-------|--------|
| $p_y$ | 0.000  | 0.006 | -0.107 |
| $p_z$ | 0.006  | 0.000 | 0.019  |
| $p_x$ | -0.107 | 0.019 | 0.000  |

Table. S5. The difference between the square of the angular momentum matrix elements for the two magnetization directions  $|\langle o^{-/+} | L_z | u^{-/+} \rangle|^2 - |\langle o^{-/+} | L_x | u^{-/+} \rangle|^2$ .

| $u^+$         | $o^+$    |          |           |          |               |
|---------------|----------|----------|-----------|----------|---------------|
|               | $d_{xy}$ | $d_{yz}$ | $d_{z^2}$ | $d_{xz}$ | $d_{x^2-y^2}$ |
| $d_{xy}$      | 0        | 0        | 0         | 1        | -4            |
| $d_{yz}$      | 0        | 0        | 3         | -1       | 1             |
| $d_{z^2}$     | 0        | 3        | 0         | 0        | 0             |
| $d_{xz}$      | 1        | -1       | 0         | 0        | 0             |
| $d_{x^2-y^2}$ | -4       | 1        | 0         | 0        | 0             |

| $u^+$ | $\sigma$ |       |       |
|-------|----------|-------|-------|
|       | $p_y$    | $p_z$ | $p_x$ |
| $p_y$ | 0        | 0     | -1    |
| $p_z$ | 0        | 0     | 1     |
| $p_x$ | -1       | 1     | 0     |
