# Supplementary material
Source: Royal Society of Chemistry journal article supplement (doi:10.1039/d6cp00124f)

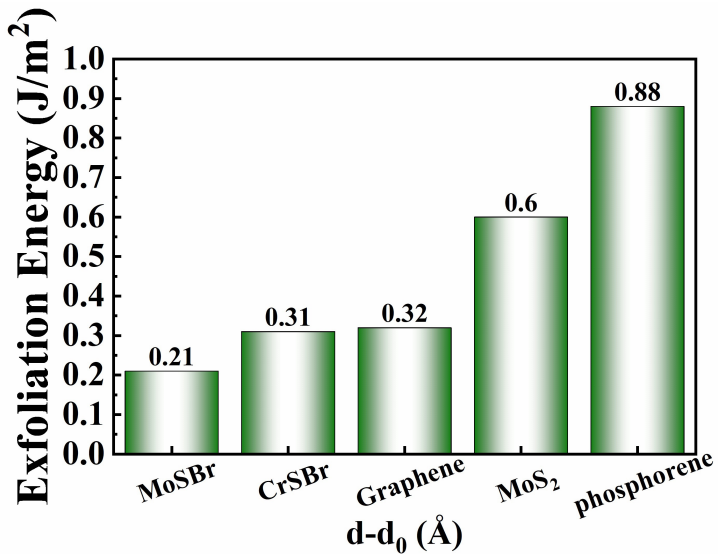

Supplement: d6cp00124f1.pdf [file d6cp00124f1.pdf]

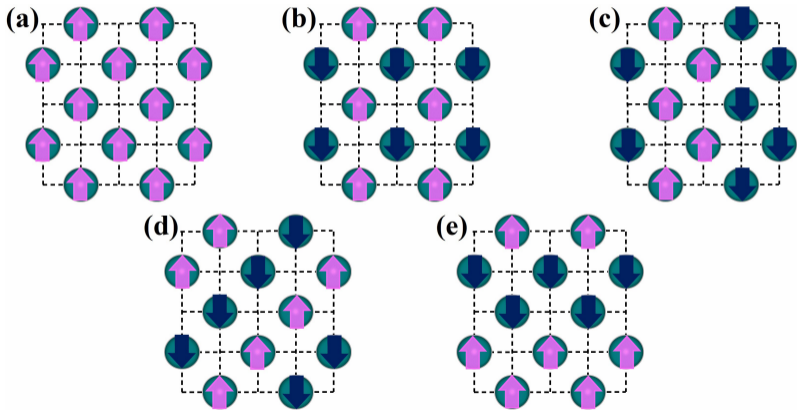

Supplement: d6cp00124f2.pdf [file d6cp00124f2.pdf]

(a)

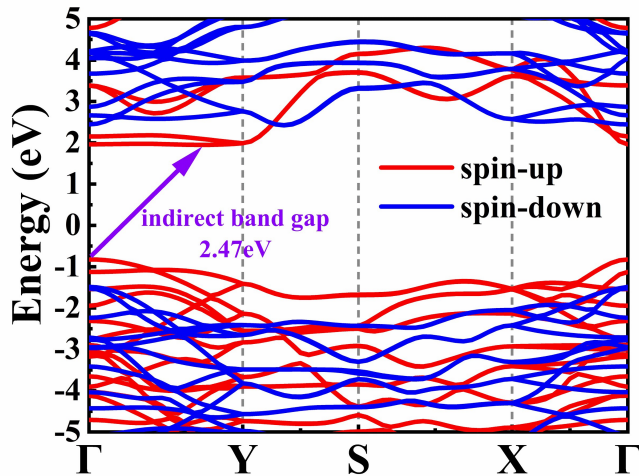

(b)

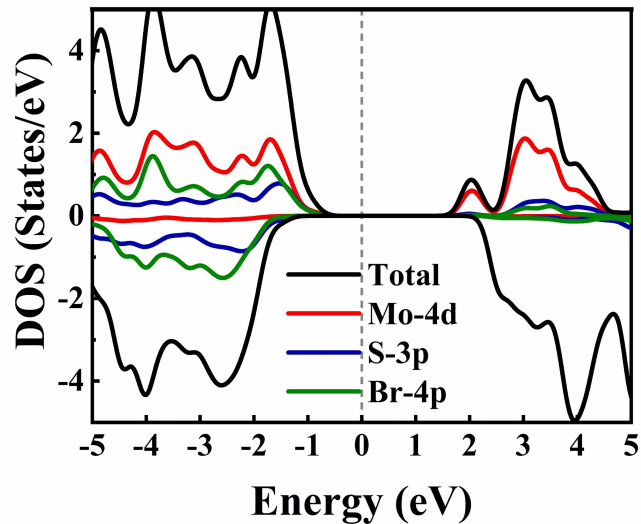

Supplement: d6cp00124f3.pdf [file d6cp00124f3.pdf]

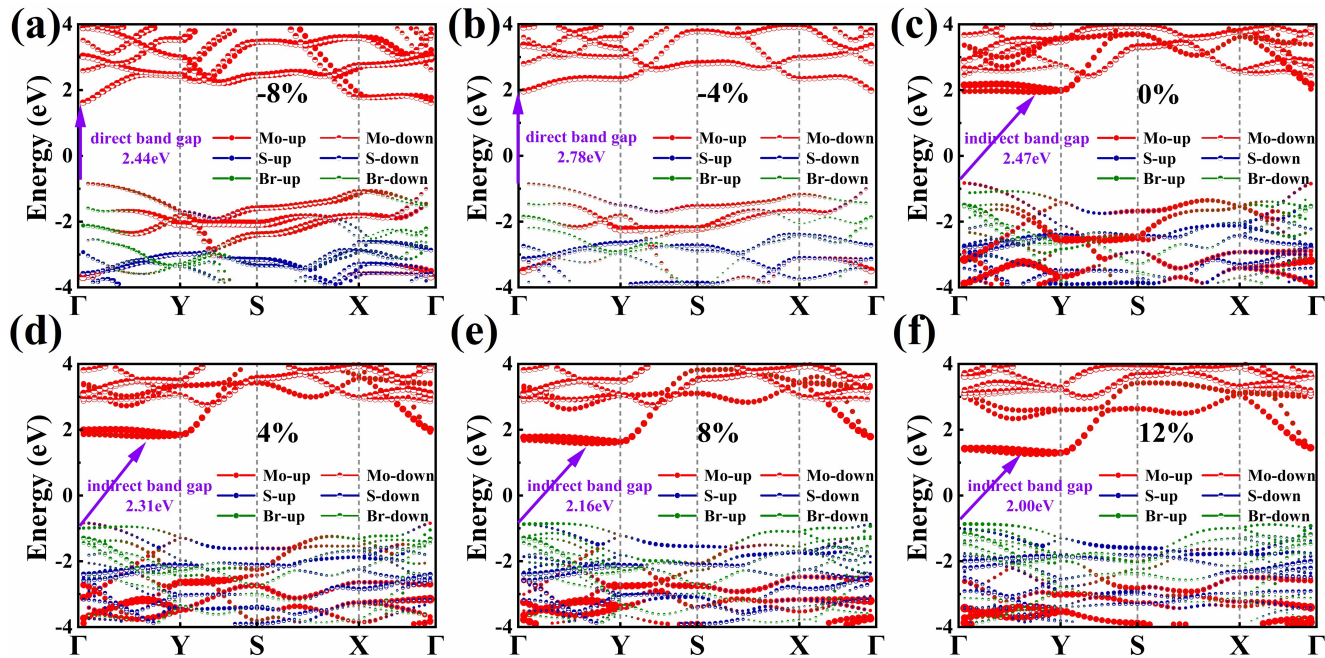

Supplement: d6cp00124f4.pdf [file d6cp00124f4.pdf]
